## 18 Abstract

19 Highly conserved noncoding elements (CNEs) comprise a significant proportion  
20 of the genomes of multicellular eukaryotes. The function of most CNEs remains  
21 elusive, but growing evidence indicates they are under some form of purifying  
22 selection. Noncoding regions in many species also harbor large numbers of trans-  
23 posable element (TE) insertions, which are typically lineage specific and depleted  
24 in exons because of their deleterious effects on gene function or expression. How-  
25 ever, it is currently unknown whether the landscape of TE insertions in noncoding  
26 regions is random or influenced by purifying selection on CNEs. Here we combine  
27 comparative and population genomic data in *Drosophila melanogaster* to show  
28 that abundance of TE insertions in intronic and intergenic CNEs is reduced rel-  
29 ative to random expectation, supporting the idea that selective constraints on  
30 CNEs eliminate a proportion of TE insertions in noncoding regions. However, we  
31 find no difference in the allele frequency spectra for polymorphic TE insertions in  
32 CNEs versus those in unconstrained spacer regions, suggesting that the distribu-  
33 tion of fitness effects acting on observable TE insertions is similar across different  
34 functional compartments in noncoding DNA. Our results provide evidence that  
35 selective constraints on CNEs contribute to shaping the landscape of TE insertion  
36 in eukaryotic genomes, and provide further evidence supporting the conclusion  
37 that CNEs are indeed functionally constrained and not simply mutational cold  
38 spots.

39 **Keywords:** Noncoding DNA, Conserved Noncoding Elements, Purifying Selec-  
40 tion, Transposable Elements, *Drosophila*.

## 41 Introduction

42 Transposable elements (TEs) are mobile DNA sequences that comprise a signif-  
43 icant fraction of the genomes of many multicellular organisms (Elliott and Gre-  
44 gory, 2015), including the model insect species, *Drosophila melanogaster* (Bergman  
45 *et al.*, 2006; Sackton *et al.*, 2009). TEs are powerful mutagenic agents that can  
46 affect gene expression and genome stability and are responsible for the majority of  
47 spontaneous mutations in *D. melanogaster* (Ashburner *et al.*, 2005). While many  
48 gaps remain in our understanding of the mechanisms that control TE content in  
49 natural populations of *D. melanogaster*, it is well established that TE insertions in  
50 the *D. melanogaster* genome are largely restricted to non-coding DNA (reviewed  
51 in Barron *et al.* (2014)). Early restriction mapping studies on a limited number of  
52 loci revealed that large DNA insertions (assumed to be TEs) were rarely found in  
53 transcribed regions (Aquadro *et al.*, 1986; Langley and Aquadro, 1987; Schaeffer  
54 *et al.*, 1988; Langley *et al.*, 1988; Aquadro *et al.*, 1992). Subsequent analysis of the  
55 *D. melanogaster* reference genome showed that the paucity of TEs in transcribed  
56 regions is primarily driven by a strong depletion of the number of TE insertions in  
57 exons combined with a weaker reduction in introns (Kaminker *et al.*, 2002; Lipatov  
58 *et al.*, 2005). More recently, analysis of population genomic data has confirmed  
59 that TE insertions are rare in *D. melanogaster* exonic regions (Kofler *et al.*, 2012;  
60 Cridland *et al.*, 2013; Zhuang *et al.*, 2014).

61 The under-representation of TEs in *D. melanogaster* exons is most likely explained  
62 by natural selection purging TE insertions that disrupt gene function from natu-  
63 ral populations (Lipatov *et al.*, 2005; Petrov *et al.*, 2011; Kofler *et al.*, 2012). In  
64 general, TE insertions in *D. melanogaster* are thought to be under some form of  
65 purifying selection, based on the observation that they typically have lower al-  
66 lele frequencies relative to single nucleotide polymorphisms (SNPs) from the same  
67 population (Aquadro *et al.*, 1986; Langley and Aquadro, 1987; Schaeffer *et al.*,  
68 1988; Langley *et al.*, 1988; Aquadro *et al.*, 1992; Cridland *et al.*, 2013). However,  
69 few studies have directly investigated the allele frequency distribution of TE in-  
70 sertions in exons, principally because of the lack of data, and past studies have  
71 led to mixed conclusions. Analysis of a small sample of exonic TE insertions using  
72 a pool-PCR strategy suggested their allele frequencies did not differ substantially  
73 from non-exonic TE insertions with similar genomic properties (Lipatov *et al.*,  
74 2005). In contrast, genome-wide analysis using pool-seq data showed a reduction  
75 in median allele frequencies for TE insertions in exons relative those found in  
76 intergenic regions (Kofler *et al.*, 2012).

77 In addition to effects manifest at the RNA or protein level, it is also possible TE  
78 insertions may be selected for their effects at the DNA level in noncoding regions,  
79 for example by interfering with *cis*-regulatory elements (Geyer *et al.*, 1990; Lerman  
80 and Feder, 2005). While comprehensive *cis*-regulatory maps for *D. melanogaster*  
81 remain incomplete (Negre *et al.*, 2011; Arnold *et al.*, 2013), it is well established  
82 that highly conserved noncoding elements (CNEs) are an abundant component of  
83 the *D. melanogaster* genome (Bergman and Kreitman, 2001; Siepel *et al.*, 2005)  
84 and that CNEs often overlap with known *cis*-regulatory elements (Emberly *et al.*,  
85 2003; Brody *et al.*, 2012). It has been estimated that 30%-40% of sites in *D.*  
86 *melanogaster* noncoding DNA are contained in CNEs (Siepel *et al.*, 2005), and  
87 population genetic analysis has shown that these CNEs are maintained by puri-  
88 fying selection (Casillas *et al.*, 2007). Thus, CNEs represent an abundant class of  
89 noncoding features under purifying selection that may influence the landscape of  
90 TE insertions. Previous work showed that artificially-induced TE insertions are  
91 depleted in the most highly conserved CNEs (so-called “ultra-conserved elements”)  
92 (Makunin *et al.*, 2013). However the non-random target preferences, requirement  
93 for marker gene activation in TE detection, and experimental origin of the TEs  
94 analyzed by Makunin *et al.* (2013) do not allow conclusions to be drawn about  
95 CNE-based constraints on insertion of the endogenous set of TE families in natu-  
96 ral populations. Resolving whether CNEs influence the landscape of TE insertion  
97 in natural populations of *D. melanogaster* will provide further insight into the  
98 factors governing TE dynamics in this species, and contribute to our broader un-  
99 derstanding of the forces that shape genome organization and molecular evolution  
100 in general.

101 Here we use genome-wide datasets of “non-reference” TE insertions (i.e. TEs  
102 identified in a resequenced sample that are not present in the reference genome)  
103 from a North American population of *D. melanogaster* (Mackay *et al.*, 2012; Lin-  
104 heiro and Bergman, 2012; Zhuang *et al.*, 2014) to investigate whether selective  
105 constraints on CNEs influence the landscape of TE insertions in noncoding DNA.  
106 These datasets allow unprecedented insight into this fundamental question by pro-  
107 viding large samples of naturally-occurring TE insertions mapped at nucleotide-  
108 level resolution in individual strains of *D. melanogaster*. We initially establish  
109 that signals of purifying selection can be observed in our data by confirming past  
110 results that the abundance of TE insertions is strongly reduced in exonic regions  
111 and weakly reduced in intronic regions relative to intergenic regions. We then  
112 show that the abundance of TE insertions is significantly reduced in both intronic  
113 and intergenic CNEs relative random expectations. In contrast to the clear signals  
114 of purifying selection on TE abundance, we find that the derived allele frequency

115 (DAF) spectrum for TE insertions inferred from strain-specific genome sequences  
116 does not vary significantly across different functional compartments of the *D.*  
117 *melanogaster* genome. Our results provide systematic evidence that selective con-  
118 straints on CNEs in noncoding regions influence the landscape of TE insertion  
119 in *D. melanogaster*. However, the proportion of TE insertions we estimate to  
120 be eliminated from CNEs is lower than in exonic regions, suggesting that many  
121 noncoding functional elements harbor viable TE insertion mutations in natural  
122 populations of *D. melanogaster*. Our results also suggest that the evolutionary  
123 forces governing the abundance of TE insertions in different functional compart-  
124 ments of the *D. melanogaster* genome may be decoupled from those controlling  
125 the allele frequency of observable TE insertions in natural populations.

## 126 **Materials and Methods**

### 127 **Data Sets**

128 Annotations of genes (flyBaseGene), TEs in the reference genome (rmsk), and  
129 conserved elements (phastCons15way) on Release 5 (dm3) coordinates of the *D.*  
130 *melanogaster* genome were obtained from UCSC Genome Browser (Siepel *et al.*,  
131 2005; Smit *et al.*, 2013; Gramates *et al.*, 2017; Tyner *et al.*, 2017). Annotations  
132 of non-reference TE insertion in the *Drosophila* Genetic Reference Panel (DGRP)  
133 of *D. melanogaster* strains from Raleigh, NC (Mackay *et al.*, 2012) were obtained  
134 from supplementary materials of papers describing two different TE detection  
135 methods: `ngs_te_mapper` (Linheiro and Bergman, 2012) and `TEMP` (Zhuang *et al.*,  
136 2014).

137 The `ngs_te_mapper` dataset consists of non-reference TE insertions from 37 long  
138 terminal repeat (LTR) retrotransposon and terminal inverted repeat (TIR) trans-  
139 poson families on the major chromosome arms (chrX, chr2L, chr2R, chr3L, chr3R  
140 and chr4) identified using whole-genome Illumina shotgun sequence data in 166  
141 DGRP strains (Linheiro and Bergman, 2012). A new BED file for this dataset  
142 was generated by Dr. Raquel Linheiro (personal communication) that encodes  
143 the number of DGRP strains in which each insertion was found in the score col-  
144 umn (Linheiro and Bergman, 2014). The `TEMP` dataset consists of non-reference  
145 TE insertions from 56 LTR retrotransposon, non-LTR retrotransposon and TIR  
146 transposon families identified using whole-genome Illumina shotgun sequence data  
147 in 53 DGRP strains (Zhuang *et al.*, 2014). We transformed the original `TEMP`

148 dataset from from [https://zlab.umassmed.edu/TEMP/TEMP\\_resources/DGRP\\_](https://zlab.umassmed.edu/TEMP/TEMP_resources/DGRP_)  
149 `53lines_TE_polymorphisms.tar.gz` to match the format of the `ngs_te_mapper`  
150 dataset as follows. TE insertions in `*.insertion.refined.bp.refsup` files were merged  
151 across all strains, then insertions supported by split-read data on both ends of  
152 the TE found on the major chromosome arms (chrX, chr2L, chr2R, chr3L, chr3R  
153 and chr4) were extracted, converted to BED format, sorted, and clustered using  
154 BEDtools complement (`-s -d 0`) (Quinlan and Hall, 2010). The number of strains  
155 per cluster containing a TE insertion for the same TE family on the same strand  
156 was then encoded in the score column of a BED-formatted file. For both datasets,  
157 a small number of TE insertions were predicted to occur at the same location,  
158 either from closely related TE families (e.g. *Stalker vs. Stalker 4*) or for TIR  
159 elements predicted on opposite strands at the same location (e.g. *S* element).  
160 We kept one of these redundant annotations based on the first occurrence in the  
161 dataset. Finally, we excluded all *P* element insertions from both datasets, since  
162 this TE family is known to have a strong non-random preference to insert around  
163 transcriptional start sites (Spradling *et al.*, 1995; Bellen *et al.*, 2004; Kofler *et al.*,  
164 2015).

## 165 **Assigning TE insertions to genomic compartments**

166 We partitioned regions of the *D. melanogaster* genome into mutually-exclusive  
167 exonic, intronic and intergenic compartments based on the gene structures in the  
168 dm3 flyBaseGene track using the `overlapSelect` and `BEDtools intersect`, comple-  
169 ment, `subtract tools` (Kuhn *et al.*, 2013; Quinlan and Hall, 2010). Each tool was  
170 run using default parameter settings. Our partitioning strategy follows Lipatov  
171 *et al.* (2005) and assumes a hierarchy of functional constraints for genomic regions  
172 that have multiple annotation states due to alternative splicing or promoter usage:  
173 namely, functional constraints on exonic regions take precedence over intronic re-  
174 gions, and constraints on intronic regions take precedence over intergenic regions.  
175 Exonic regions span the union of all exon intervals in the genome and include both  
176 coding sequences (CDS) and untranslated regions (UTRs). Intronic regions were  
177 defined as the complement of exonic regions in genomic intervals spanned by at  
178 least one transcript model. Intergenic regions were defined as the complement of  
179 all exonic and intronic regions. Intronic and intergenic regions were further parti-  
180 tioned into CNEs and spacers using the dm3 `phastCons15way` track. Spacers are  
181 defined as the noncoding regions complementary to CNEs that exhibit low primary  
182 sequence conservation (Bergman *et al.*, 2002; Casillas *et al.*, 2007). Reference TE  
183 intervals were subtracted from all exonic, intronic, intergenic, CNE, and spacer

184 compartments.

185 Non-reference TE insertions in the `ngs_te_mapper` and TEMP datasets were then  
186 assigned to genomic compartments in high recombination regions using overlapSe-  
187 lect (Kuhn *et al.*, 2013). The locations of the non-reference TE insertions studied  
188 here are annotated as their target site duplication (TSD) (Linheiro and Bergman,  
189 2012; Zhuang *et al.*, 2014), which span small intervals (typically <10 bp) on refer-  
190 ence genome coordinates and can therefore overlap the boundaries of neighboring  
191 genomic compartments. To avoid counting TEs that overlap boundaries multi-  
192 ply or partially in different compartments, a series of filtering steps was imple-  
193 mented to identify TE insertions that overlap intronic/exonic, intergenic/exonic  
194 and CNE/spacer boundaries. Each distinct category of “overlapping” TE inser-  
195 tions is mutually exclusive with other overlapping or “pure” compartments. Non-  
196 reference TEs found fully or partially in annotated in reference TE intervals were  
197 removed from all datasets.

198 We restricted our analysis to regions of the *D. melanogaster* Release 5 genome  
199 sequence with normal rates of recombination using criteria established in previous  
200 population genomic analyses of TEs in *D. melanogaster* (Cridland *et al.*, 2013,  
201 2015): chrX:300000-20800000, chr2L:200000-20100000, chr2R:2300000-21000000,  
202 chr3L:100000-21900000, chr3R:600000-27800000. Low recombination regions were  
203 excluded because of the high density of reference TE insertions in these regions  
204 (Bartolome *et al.*, 2002; Bergman *et al.*, 2006), which poses challenges to iden-  
205 tifying non-reference TE insertions as well as defining CNEs using comparative  
206 genomic data. Furthermore, the efficacy of natural selection on individual alleles  
207 is reduced in regions of the *Drosophila* genome with low rates of recombination be-  
208 cause of the confounding effects of selection on linked sites extending over larger  
209 regions (Presgraves, 2005; Haddrill *et al.*, 2007). Normally-recombining regions  
210 occupy 89.8% of the 120 Mb Release 5 genome. The numbers of nucleotides and  
211 proportion of the genome spanned by each compartment in normally-recombining  
212 and normally-recombining noncoding regions are shown in Tables 1 and 2, re-  
213 spectively. The majority of non-reference TEs in both datasets studied here were  
214 located in normally-recombining regions (`ngs_te_mapper`:  $n = 6099/6747$ , 90.4%;  
215 TEMP: 4688/5331, 87.9%).

## 216 Testing for purifying selection on TE insertions

217 We tested for depletion of TE insertions in different genomic compartments rel-  
218 ative to random expectations using a permutation approach, which accounts for  
219 the empirical length distributions of intervals in different genomic compartments  
220 and accommodates the variable lengths of TSDs for non-reference TEs. Random  
221 TE insertion was simulated using BEDTools shuffle to permute the location of TE  
222 insertions in different compartments of the Release 5 genome. Random TE inser-  
223 tions were required to be placed within their same chromosome (*-chrom* option),  
224 were not allowed to overlap each other (*-noOverlapping* option), and were not  
225 allowed to land in regions of the reference genome annotated as TE by Repeat-  
226 Masker (Smit *et al.*, 2013). We attempted to control for the effects of selection on  
227 non-focal genomic compartments by excluding TEs from these regions and black-  
228 listing insertion in non-focal regions using the BEDtools shuffle *-excl* option. The  
229 *-seed* option was used to allow results of each run to be replicated. TE insertions  
230 in randomized datasets were then assigned to genomic compartments as described  
231 above.

232 A series of permutation tests were performed to test the null hypothesis of ran-  
233 dom TE insertion across various sets of genomic compartments. All permutation  
234 tests were restricted to normally-recombining regions of the genome as defined  
235 above. First, TE insertions observed in all compartments were allowed to ran-  
236 domly insert into all compartments to test if TEs are depleted in exonic regions  
237 relative to noncoding DNA. Second, TE insertions observed in noncoding regions  
238 were allowed to randomly insert in noncoding regions to test if TEs are depleted  
239 in introns relative to intergenic regions, independent of the effects of purifying  
240 selection on exonic regions. Third, TE insertions observed in intronic regions were  
241 allowed to randomly insert in intronic regions to test if TEs are depleted in intronic  
242 CNEs relative to intronic spacers, independent of the effects of purifying selection  
243 on exonic or intergenic regions but accounting for potential selection on introns.  
244 Finally, TE insertions observed in intergenic regions were allowed to randomly  
245 insert in intergenic regions to test if TEs are depleted in intergenic CNEs relative  
246 to intergenic spacers, independent of the effects of purifying selection on exonic or  
247 intronic regions. For each test, 10,000 permutations were performed to provide a  
248 distribution of outcomes under the null hypothesis of random insertion.

249 Additionally, we tested whether the derived allele frequency (DAF) of TE inser-  
250 tions in putatively selected genomic compartments (exonic regions, CNEs) dif-  
251 fered from control regions (intergenic spacers). Following previous efforts testing



252 whether CNEs are cold spots of point mutation (Drake *et al.*, 2006; Casillas *et al.*,  
253 2007), the null hypothesis of no difference in DAF between “selected” and “con-  
254 trol” compartments was tested using a non-parametric Wilcoxon rank sum test.  
255 DAF tests of TE insertion allele frequencies in CNEs *vs.* spacers were performed  
256 separately for intronic and intergenic regions. As in related work (Petrov *et al.*,  
257 2011; Kofler *et al.*, 2012; Cridland *et al.*, 2013), we assumed all TE insertions  
258 represent the derived state since, with the exception of the *INE-1* family that  
259 is not studied here (Singh *et al.*, 2005; Wang *et al.*, 2007), few TE insertions  
260 in *D. melanogaster* are thought to have occurred prior to speciation (Caspi and  
261 Pachter, 2006; Bergman and Bensasson, 2007; Sackton *et al.*, 2009). Rare TE in-  
262 sertions spanning intron/exon on intergenic/exon boundaries were excluded from  
263 DAF analysis because of their low sample sizes. However, TE insertions span-  
264 ning CNE/spacer boundaries were relatively common, and thus were analyzed as  
265 distinct class and compared to TEs contained fully within spacers.

266 All graphical and statistical analyses were performed in the R programming envi-  
267 ronment (version 3.4.0) (R Core Team, 2016).

## 268 Results

### 269 TE insertions are depleted in conserved noncoding elements

270 To understand whether selective constraints on noncoding DNA influence pat-  
271 terns of TE insertion, we analyzed the abundance of non-reference TEs insertions  
272 in different functional genomic compartments of the *D. melanogaster* genome.  
273 We first assigned non-reference TE insertions in normally-recombining regions to  
274 functional compartments based on gene and conserved element annotations (see  
275 Materials and Methods for details). We then tested for depletion of non-reference  
276 TE insertions in genomic regions with putatively higher levels of functional con-  
277 straint (i.e. exonic regions, CNEs) by comparing observed numbers of TEs in these  
278 regions to an empirical null distribution based of 10,000 random permutations of  
279 the observed TE insertion datasets. Recent studies have shown that no single  
280 bioinformatic system can comprehensively identify all non-reference TE insertions  
281 in resequencing data (Nelson *et al.*, 2017; Rishishwar *et al.*, 2017). Therefore, we  
282 used two independent non-reference TE insertion datasets, `ngs_te_mapper` (Lin-  
283 heiro and Bergman, 2012) and `TEMP` (Zhuang *et al.*, 2014), both derived from the  
284 same sample of strain-specific genome sequences isolated from a North American

285 population of *D. melanogaster* (Mackay *et al.*, 2012). Both datasets analyzed here  
286 both provide large samples of non-reference TE insertions with nucleotide-level  
287 resolution based on split-read information, which improves identification of allelic  
288 insertions occupying the same insertion site in different strains and assignment of  
289 TE insertion sites to specific genomic compartments.

290 As a positive control, we first tested whether the previously-reported depletion  
291 of TE insertions in *D. melanogaster* exonic regions (Lipatov *et al.*, 2005; Kofler  
292 *et al.*, 2012; Cridland *et al.*, 2013) could be observed in the `ngs_te_mapper` and  
293 TEMP datasets using our randomization procedure. As shown in Table 1, several  
294 hundred TE insertions in exonic regions can be found in natural populations of *D.*  
295 *melanogaster* (see also Kofler *et al.* (2012); Cridland *et al.* (2013)). Nevertheless,  
296 we observed a clear depletion of TE insertions in exonic regions relative to random  
297 expectations (Figure 1A), coupled with a concomitant excess in intronic regions  
298 (Figure 1B) and intergenic regions (Figure 1C). We estimate a 4-fold ( $P < 1e-04$ )  
299 and 4.35-fold ( $P < 1e-04$ ) reduction in TEs in exonic regions relative to the me-  
300 dian of random outcomes for the `ngs_te_mapper` and TEMP datasets, respectively  
301 (Figure 1A). We also detected evidence for a significant depletion of TE insertions  
302 spanning intron/exon boundaries (Figure 1D) for both `ngs_te_mapper` (4.6-fold  
303 reduction,  $P = 1e-04$ ) and TEMP (5.9-fold reduction,  $P < 1e-04$ ), consis-  
304 tent with the presence of “hazardous zones” for TE insertion near intron-exon  
305 junctions shown previously in humans (Zhang *et al.*, 2011). In contrast, we ob-  
306 served no significant depletion of TEs at intergenic/exon boundaries (Figure 1E;  
307 `ngs_te_mapper`:  $P = 0.98$ ; TEMP:  $P = 0.27$ ). These results support previous anal-  
308 yses that TEs are selectively eliminated from exonic regions (Lipatov *et al.*, 2005;  
309 Petrov *et al.*, 2011; Kofler *et al.*, 2012; Cridland *et al.*, 2013), and demonstrate that  
310 our approach can detect selective constraints on TE insertions that are assumed  
311 to exist in the *D. melanogaster* genome.

312 We next investigated whether our data provide evidence that purifying selection  
313 eliminates a higher proportion of TEs in intronic regions relative to intergenic re-  
314 gions, by permuting the locations of TEs in noncoding regions only. We observed  
315 a trend towards fewer TE insertions in intronic regions relative to random expec-  
316 tation (Figure 1F) with a corresponding excess in intergenic regions (Figure 1G)  
317 in both datasets. The magnitude of this effect was weak but highly significant in  
318 the `ngs_te_mapper` dataset (1.05-fold reduction,  $P = 3e-04$ ), and of a similar  
319 magnitude but less significant in the TEMP dataset (1.02-fold reduction,  $P = 0.05$ ).  
320 Our results support those of Kofler *et al.* (2012) who similarly observed a weak  
321 but significant reduction in numbers of TE insertions in intronic regions relative

322 to intergenic regions using pool-seq data, but differ from Cridland *et al.* (2013)  
323 who observed more TEs in intronic regions relative to intergenic regions using  
324 strain-specific genome data. Together, these results suggest that the TE density  
325 in *D. melanogaster* intronic regions is weakly reduced relative to random expect-  
326 tations, but that the proportion of TEs eliminated from intronic regions is not  
327 sufficiently large for the effect to be reliably identified in all population genomic  
328 datasets.

329 Finally, we tested whether TE insertions were depleted in CNEs relative to spacer  
330 regions (Figure 2). For this analysis, we randomized TE insertions separately  
331 within intronic regions and within intergenic regions and accounted for TE in-  
332 sertions spanning CNE/spacer boundaries. We identified several hundred TE in-  
333 sertions that exist in CNEs in both intronic and intergenic regions (Table 2).  
334 Nonetheless, we found evidence for a significant depletion in the density of TEs  
335 in CNEs in both intronic regions (Figure 2A; `ngs_te_mapper`: 1.21-fold reduction,  
336  $P < 1e - 04$ ; TEMP: 1.31-fold reduction,  $P < 1e - 04$ ) and intergenic regions (Fig-  
337 ure 2B; `ngs_te_mapper`: 1.3-fold reduction,  $P < 1e - 04$ ; TEMP: 1.3-fold reduction,  
338  $P < 1e - 04$ ). We also observed a weaker trend towards fewer TE insertions over-  
339 lapping CNE/spacer boundaries relative to random expectation in both intronic  
340 regions (Figure 2C; `ngs_te_mapper`: 1.18-fold reduction,  $P = 0.04$ ; TEMP: 1.23-fold  
341 reduction,  $P = 0.002$ ) and intergenic regions (Figure 2D; `ngs_te_mapper`: 1.16-  
342 fold reduction,  $P = 0.16$ ; TEMP: 1.28-fold reduction,  $P = 1e - 04$ ). Correspond-  
343 ingly, we also observe that TE insertions in both datasets are over-represented  
344 in spacers in both intronic regions (Figure 2E; `ngs_te_mapper`: 1.11-fold excess,  
345  $P < 1e - 04$ ; TEMP: 1.15-fold excess,  $P < 1e - 04$ ) and intergenic regions (Figure 2F;  
346 `ngs_te_mapper`: 1.83-fold excess,  $P < 1e - 04$ ; TEMP: 1.17-fold excess,  $P < 1e - 04$ ).  
347 Overall, these results suggest that while some CNEs tolerate disruption by large  
348 TE insertions, constraints on CNEs are substantial enough to eliminate enough  
349 TE insertions in CNEs to bias the distribution of observed TE insertions towards  
350 spacers in noncoding regions of the *D. melanogaster* genome.

## 351 **Allele frequencies of TE insertions are similar across differ-** 352 **ent functional compartments of the *D. melanogaster* genome**

353 Additional evidence for purifying selection acting to shape the landscape of TE in-  
354 sertions can be obtained from investigating the allele frequencies of TE insertions  
355 in population samples. Population genetics theory predicts that natural selection  
356 will prevent new deleterious alleles from reaching high population frequency (Fay

357 *et al.*, 2001). If polymorphic TE insertions are weakly negatively selected, they  
358 should be skewed towards lower allele frequencies in regions under higher of selec-  
359 tive constraint such as exonic regions and CNEs relative to control regions that  
360 have weaker functional constraint. A skew in the frequency of *D. melanogaster*  
361 SNPs toward rarer alleles has previously been observed in CNEs relative to spacers  
362 (Casillas *et al.*, 2007) and in replacement sites relative to silent sites (Huang *et al.*,  
363 2014). However, small indels showed no tendency to be skewed towards rarer alle-  
364 les in CNEs relative to spacers, suggesting a similar distribution of fitness effects  
365 for small indels in both types of noncoding region (Casillas *et al.*, 2007).

366 Figure 3 shows the DAF spectra for TE insertions in different functional compart-  
367 ments across the *D. melanogaster* genome. Consistent with classical restriction  
368 mapping and *in situ* hybridization studies (reviewed in Charlesworth and Langley  
369 (1989); Nuzhdin (1999)) and recent strain-specific population genomic data (Crid-  
370 land *et al.*, 2013), both methods show the expected pattern for TE insertion alleles  
371 to be skewed towards rare alleles in all genomic compartments. However, clear dif-  
372 ferences are observed between `ngs_te_mapper` (Figure 3A) and TEMP (Figure 3B)  
373 in the overall shape of the DAF spectra across all compartments, with a skew to-  
374 wards more rare alleles in the `ngs_te_mapper` dataset relative to TEMP. We interpret  
375 overall differences in DAF spectra between TE datasets to result primarily from  
376 the higher false negative rate for `ngs_te_mapper` relative to TEMP (Nelson *et al.*,  
377 2017) (see see Discussion). Regardless of the cause, comparison of DAF spectra  
378 across genomic compartments *within* a dataset should not be substantially com-  
379 promised, since all compartments are affected by the same methodological biases  
380 in TE detection.

381 We first performed a control analysis to assess whether the expected skew towards  
382 lower allele frequencies could be observed for TE insertion in exonic regions. For  
383 this and all subsequent DAF spectra analyses, we used TE insertions in intergenic  
384 spacers a control, based on abundance results above showing this compartment was  
385 under the weakest selective constraint for TE insertion. As shown in Figure 3, we  
386 find no significant differences between the DAF spectra for TEs in exonic regions in  
387 either dataset: (`ngs_te_mapper`:  $W = 391158.5$ ,  $P = 0.43$ ; TEMP:  $W = 205299.5$ ,  
388  $P = 0.36$ ). One possibility for the lack of skew towards rarer alleles for TEs  
389 in exonic regions is the presence of a small number of unusually high-frequency  
390 exonic TE insertions that are potentially involved in adaptation to insecticide  
391 resistance (arrows, Figure 3A,B) (`ngs_te_mapper`: 1360 in *sut1* (Steele *et al.*,  
392 2015); TEMP: 17.6 in *cyp6a2* (Waters *et al.*, 1992; Delpuech *et al.*, 1993; Wan  
393 *et al.*, 2014), *accord* in *cyp6g1* (Daborn *et al.*, 2002; Chung *et al.*, 2007)). When

394 these putatively-adaptitive outlier loci are excluded, TEs in exonic regions still  
395 do not show a consistent skew towards rarer alleles relative to those in intergenic  
396 spacers regions: (`ngs_te_mapper`:  $W = 389232.5$ ,  $P = 0.5$ ; `TEMP`:  $W = 203853.5$ ,  
397  $P = 0.27$ ). These results suggest that the distribution of fitness effects for exonic  
398 TE insertions that are not strongly deleterious does not differ substantially from  
399 those in intergenic spacers (see also Lipatov *et al.* (2005)).

400 Next, we tested whether the DAF spectrum for TE insertions in CNEs differed  
401 from those in noncoding spacer regions. In this analysis, we also considered the  
402 DAF spectrum of TE insertions that spanned CNE/spacer boundaries, because  
403 this overlap class is reasonably common and also exhibits a trend towards being  
404 depleted in TE insertions (see above). As shown in Figure 3, we found no signif-  
405 icant differences in the DAF spectra for TEs in CNEs relative to those in spacer  
406 intervals in both intronic regions (`ngs_te_mapper`:  $W = 671827$ ,  $P = 0.19$ ; `TEMP`:  
407  $W = 358690$ ,  $P = 0.29$ ) and intergenic regions (`ngs_te_mapper`:  $W = 767402.5$ ,  
408  $P = 0.2$ ; `TEMP`:  $W = 411058$ ,  $P = 0.31$ ). Likewise, the DAF spectra for TEs over-  
409 lapping CNE/spacer boundaries did not differ from TEs fully contained in spacer  
410 intervals in both intronic regions (`ngs_te_mapper`:  $W = 141937$ ,  $P = 0.98$ ; `TEMP`:  
411  $W = 139781.5$ ,  $P = 0.46$ ) and intergenic regions (`ngs_te_mapper`:  $W = 157028.5$ ,  
412  $P = 0.83$ ; `TEMP`:  $W = 132093$ ,  $P = 0.44$ ). Similar to previous results for small in-  
413 dels (Casillas *et al.*, 2007), these results imply that the distribution of fitness effects  
414 on large TE insertions wholly or partially contained in CNEs is not substantially  
415 different from that operating on spacer regions in noncoding DNA.

## 416 Discussion

417 Here we show that the abundance of TE insertions is significantly reduced rel-  
418 ative to random expectation in two distinct genomic compartments with known  
419 or suspected function: exonic regions and CNEs. In contrast, we find no clear  
420 signature for a skew towards lower allele frequencies for TEs in these genomic  
421 compartments when compared to regions of the genome under the lowest level of  
422 selective constraint. Our results provide the first systematic evidence that selec-  
423 tive constraints on CNEs influence the landscape of TE insertion in a eukaryote  
424 genome, and provide new evidence supporting the conclusion that CNEs are func-  
425 tionally constrained and not mutational cold spots. Our results also suggest that  
426 distribution of fitness effects acting on polymorphic TEs insertions (which have  
427 escaped rapid elimination by strong purifying selection) is similar across different  
428 functional compartments of the *D. melanogaster* genome.

429 Our conclusions are derived from two TE insertion datasets (`ngs_te_mapper` and  
430 `TEMP`), indicating they are not dependent on the idiosyncracies of a single method  
431 for calling TE insertions in short-read resequencing data. Nevertheless, it is im-  
432 portant to consider how our results may be affected by the imperfect state of the  
433 art in TE calling in terms of positional accuracy and false negative rates (Nelson  
434 *et al.*, 2017; Rishishwar *et al.*, 2017). It is unlikely that the depletion of TE inser-  
435 tions we observe is due to imprecise annotation of the TE insertions analyzed here,  
436 since under-representation of TEs in exonic regions has been observed previously  
437 using a variety of different classical and genomic approaches (Aquadro *et al.*, 1986;  
438 Langley and Aquadro, 1987; Schaeffer *et al.*, 1988; Langley *et al.*, 1988; Aquadro  
439 *et al.*, 1992; Kaminker *et al.*, 2002; Bartolome *et al.*, 2002; Lipatov *et al.*, 2005;  
440 Kofler *et al.*, 2012; Cridland *et al.*, 2013; Zhuang *et al.*, 2014). Likewise, false  
441 negatives are unlikely to generate the abundance patterns we observe. For this  
442 to be the case, the allele frequency of TE insertions would need to be skewed to-  
443 wards higher frequencies in compartments with lower levels of constraint, so that a  
444 higher relative proportion of singleton TE insertion sites would fail to be detected  
445 in compartments under higher constraint (leading to an artifactually lower number  
446 of insertion sites in high constraint regions). However, we find no evidence for a  
447 skew towards higher DAF in compartments with lower levels of constraint in our  
448 data (Figure 3).

449 Although we observe the expected pattern of depletion of TEs in higher constraint  
450 regions, we find no difference in the DAF spectra between highly constrained  
451 and weakly constrained compartments within either the `ngs_te_mapper` or `TEMP`  
452 datasets. It is unlikely that positional inaccuracy or false negatives can explain the  
453 lack of difference in the DAF spectra between exonic regions or CNEs and spacers.  
454 As above, the high positional accuracy of the `ngs_te_mapper` and `TEMP` datasets  
455 mitigates against mis-assignment of TEs to the wrong compartment, which could  
456 in principle cause the DAF spectra for different compartments to appear more  
457 similar than they really are. Furthermore, in the case of CNEs, we accounted for  
458 potential blurring of compartment assignment by showing that the DAF spectra of  
459 TEs spanning CNE/spacer boundaries have similar allele frequencies to TEs fully  
460 contained within CNEs. Additionally, while it is clear that false negatives distort  
461 the DAF spectrum towards rare alleles (Emerson *et al.*, 2008), TEs in our study  
462 were detected independent of any information about functional compartment and  
463 thus false negatives should affect the DAF spectra for all functional compartments  
464 in a similar way.

465 Importantly, we did observe systematic differences in the DAF across TE detec-

466 tion methods, which has not been discussed sufficiently as an issue in popula-  
467 tion genomic analysis of TE insertions. Specifically, we find that the DAF for  
468 `ngs_te_mapper` is skewed more towards lower frequencies than the DAF for `TEMP`  
469 (Figure 3A *vs.* B). We do not interpret this difference among methods to result  
470 from lower positional accuracy of `ngs_te_mapper` relative to `TEMP` artificially split-  
471 ting alleles from the same insertion site into several different insertion sites each  
472 at lower allele frequency, since both datasets use split-read information. Rather it  
473 is more likely this difference in DAF among methods results from the higher false  
474 negative rate for `ngs_te_mapper` (58% on simulated data (Nelson *et al.*, 2017))  
475 relative to `TEMP` (10% on simulated data (Nelson *et al.*, 2017)). This observation  
476 cautions against naive use of allele frequency data from short-read TE insertion  
477 detection methods to test predictions of population genetic models, since the pre-  
478 cise shape of the frequency spectrum may be determined by false negative rates  
479 of TE detection methods rather than any particular evolutionary force (Emerson  
480 *et al.*, 2008). This result also motivates more advanced methods to estimate  
481 the TE frequency spectra that incorporate false negative detection rates, similar  
482 to methods for estimating the frequency spectrum of SNPs that incorporate false  
483 positive rates due to sequencing error (Kim *et al.*, 2011; Nielsen *et al.*, 2012).

484 Our twin findings of depletion of TEs in functional elements like exonic regions and  
485 CNEs coupled with a lack of a skew toward rarer alleles in these regions suggests  
486 that the selective mechanism controlling location of TEs in the *D. melanogaster*  
487 genome may be decoupled from the forces governing allele frequencies of polymor-  
488 phic alleles (Petrov *et al.*, 2011). Among competing theories for selective forces  
489 acting on TE insertions (Nuzhdin, 1999; Lee and Langley, 2010), it is easiest to  
490 interpret the depletion of TEs in exonic regions as being due to the direct effects  
491 of TE insertion (Petrov *et al.*, 2011; Kofler *et al.*, 2012) and the same logic should  
492 hold for depletion of TEs in CNEs. However, the similarity of DAF spectra in  
493 different genomic compartments is consistent with the remainder of TE insertions  
494 that are not eliminated from functional elements being governed by a number of  
495 evolutionary mechanisms. Polymorphic TE insertions could be at similar allele  
496 frequencies in different compartments simply because they inserted at similar dis-  
497 tributions of times in the past (Bergman and Bensasson, 2007; Kofler *et al.*, 2012;  
498 Blumenstiel *et al.*, 2014). Alternatively, the similar DAF spectra of polymorphic  
499 TE insertions in different genomic compartments could reflect similar distributions  
500 of selective effects that are independent of the precise location of a TE insertion,  
501 which might be expected if the deleterious effects of TE insertion are caused by  
502 ectopic exchange events (Petrov *et al.*, 2011; Kofler *et al.*, 2012) or local epigenetic  
503 silencing spreading from TE insertions (Lee, 2015; Lee and Karpen, 2017). While

504 our work does not resolve these widely-debated alternatives, it does reveal that the  
505 selective effects of TE insertion on conserved elements in noncoding DNA needs  
506 to be factored into future models explaining TE evolution in *D. melanogaster* and  
507 other species.



## 508 **Acknowledgments**

509 The authors would like to thank Raquel Linheiro, Michael Nelson, Florence Gutzwiller  
510 and Mar Marzo Llorca for their valuable suggestions throughout this project,  
511 and members of the Bergman, Dyer, Hall and White Labs for comments on the  
512 manuscript. This work was funded by Life Science and Environment Research  
513 Institute, King Abdulaziz City for Science and Technology.

## 514 **Author Contributions**

515 CMB conceived and designed the experiments; MMM and JJ carried out the  
516 experiments; MMM and CMB analyzed the data; MMM and CMB wrote the  
517 manuscript. All authors reviewed the manuscript.

## 518 **Conflicts of interest**

519 The authors declare that there is no conflict of interest for this article and there  
520 is no financial employment, consultancies, honoraria, stock ownership or options,  
521 expert testimony, grants or patents received or pending, royalties related to this  
522 manuscript.

## 523 References

- 524 Aquadro, C. F., S. F. Desse, M. M. Bland, C. H. Langley, and C. C. Laurie-  
525 Ahlberg, 1986 Molecular population genetics of the alcohol dehydrogenase gene  
526 region of *Drosophila melanogaster*. *Genetics* **114**: 1165–90.
- 527 Aquadro, C. F., R. M. Jennings, M. M. Bland, C. C. Laurie, and C. H. Langley,  
528 1992 Patterns of naturally occurring restriction map variation, dopa decarboxy-  
529 lase activity variation and linkage disequilibrium in the *Ddc* gene region of  
530 *Drosophila melanogaster*. *Genetics* **132**: 443–52.
- 531 Arnold, C. D., D. Gerlach, C. Stelzer, L. M. Boryn, M. Rath, and A. Stark, 2013  
532 Genome-wide quantitative enhancer activity maps identified by STARR-seq.  
533 *Science* **339**: 1074–1077.
- 534 Ashburner, M., K. G. Golic, and R. S. Hawley, 2005 *Drosophila: A Laboratory*  
535 *Handbook*. Cold Spring Harbor Laboratory Press, Cold Spring Harbor, N.Y.
- 536 Barron, M. G., A.-S. Fiston-Lavier, D. A. Petrov, and J. Gonzalez, 2014 Popu-  
537 lation genomics of transposable elements in *Drosophila*. *Annu Rev Genet* **48**:  
538 561–581.
- 539 Bartolome, C., X. Maside, and B. Charlesworth, 2002 On the abundance and  
540 distribution of transposable elements in the genome of *Drosophila melanogaster*.  
541 *Mol Biol Evol* **19**: 926–937.
- 542 Bellen, H. J., R. W. Levis, G. Liao, Y. He, J. W. Carlson, G. Tsang, M. Evans-  
543 Holm, P. R. Hiesinger, K. L. Schulze, G. M. Rubin, R. A. Hoskins, and A. C.  
544 Spradling, 2004 The BDGP gene disruption project: single transposon insertions  
545 associated with 40% of *Drosophila* genes. *Genetics* **167**: 761–81.
- 546 Bergman, C. M. and D. Bensasson, 2007 Recent LTR retrotransposon inser-  
547 tion contrasts with waves of non-LTR insertion since speciation in *Drosophila*  
548 *melanogaster*. *Proc Natl Acad Sci USA* **104**: 11340–11345.
- 549 Bergman, C. M. and M. Kreitman, 2001 Analysis of conserved noncoding DNA  
550 in *Drosophila* reveals similar constraints in intergenic and intronic sequences.  
551 *Genome Res* **11**: 1335–1345.
- 552 Bergman, C. M., B. D. Pfeiffer, D. E. Rincon-Limas, R. A. Hoskins, A. Gnirke,  
553 C. J. Mungall, A. M. Wang, B. Kronmiller, J. Pacleb, S. Park, M. Stapleton,  
554 K. Wan, R. A. George, P. J. d. Jong, J. Botas, G. M. Rubin, and S. E. Cel-  
555 niker, 2002 Assessing the impact of comparative genomic sequence data on the  
556 functional annotation of the *Drosophila* genome. *Genome Biol* **3**: research0086.
- 557 Bergman, C. M., H. Quesneville, D. Anxolabehere, and M. Ashburner, 2006 Re-  
558 current insertion and duplication generate networks of transposable element  
559 sequences in the *Drosophila melanogaster* genome. *Genome Biol* **7**: R112.
- 560 Blumenstiel, J. P., X. Chen, M. He, and C. M. Bergman, 2014 An age-of-allele

- 561 test of neutrality for transposable element insertions. *Genetics* **196**: 523–538.
- 562 Brody, T., A. S. Yavatkar, A. Kuzin, M. Kundu, L. J. Tyson, J. Ross, T.-Y. Lin,  
563 C.-H. Lee, T. Awasaki, T. Lee, and W. F. Odenwald, 2012 Use of a *Drosophila*  
564 genome-wide conserved sequence database to identify functionally related cis-  
565 regulatory enhancers. *Dev Dyn* **241**: 169–189.
- 566 Casillas, S., A. Barbadilla, and C. M. Bergman, 2007 Purifying selection maintains  
567 highly conserved noncoding sequences in *Drosophila*. *Mol Biol Evol* **24**: 2222–  
568 2234.
- 569 Caspi, A. and L. Pachter, 2006 Identification of transposable elements using mul-  
570 tiple alignments of related genomes. *Genome Res* **16**: 260–270.
- 571 Charlesworth, B. and C. H. Langley, 1989 The population genetics of *Drosophila*  
572 transposable elements. *Annu Rev Genet* **23**: 251–87.
- 573 Chung, H., M. R. Bogwitz, C. McCart, A. Andrianopoulos, R. H. French Con-  
574 stant, P. Batterham, and P. J. Daborn, 2007 Cis-regulatory elements in the  
575 Accord retrotransposon result in tissue-specific expression of the *Drosophila*  
576 melanogaster insecticide resistance gene *Cyp6g1*. *Genetics* **175**: 1071–1077.
- 577 Cridland, J. M., S. J. Macdonald, A. D. Long, and K. R. Thornton, 2013 Abun-  
578 dance and distribution of transposable elements in two *Drosophila* QTL mapping  
579 resources. *Mol Biol Evol* **30**: 2311–2327.
- 580 Cridland, J. M., K. R. Thornton, and A. D. Long, 2015 Gene expression variation  
581 in *Drosophila melanogaster* due to rare transposable element insertion alleles of  
582 large effect. *Genetics* **199**: 85–93.
- 583 Daborn, P. J., J. L. Yen, M. R. Bogwitz, G. Le Goff, E. Feil, S. Jeffers, N. Tijet,  
584 T. Perry, D. Heckel, P. Batterham, R. Feyereisen, T. G. Wilson, and R. H.  
585 French Constant, 2002 A single p450 allele associated with insecticide resistance  
586 in *Drosophila*. *Science* **297**: 2253–6.
- 587 Delpuech, J. M., C. F. Aquadro, and R. T. Roush, 1993 Noninvolvement of the  
588 long terminal repeat of transposable element 17.6 in insecticide resistance in  
589 *Drosophila*. *Proc Natl Acad Sci USA* **90**: 5643–5647.
- 590 Drake, J. A., C. Bird, J. Nemesh, D. J. Thomas, C. Newton-Cheh, A. Rey-  
591 mond, L. Excoffier, H. Attar, S. E. Antonarakis, E. T. Dermitzakis, and J. N.  
592 Hirschhorn, 2006 Conserved noncoding sequences are selectively constrained and  
593 not mutation cold spots. *Nat Genet* **38**: 223–227.
- 594 Elliott, T. A. and T. R. Gregory, 2015 What’s in a genome? The C-value enigma  
595 and the evolution of eukaryotic genome content. *Phil Trans R Soc B* **370**:  
596 20140331.
- 597 Emberly, E., N. Rajewsky, and E. D. Siggia, 2003 Conservation of regulatory  
598 elements between two species of *Drosophila*. *BMC Bioinformatics* **4**: 57.
- 599 Emerson, J. J., M. Cardoso-Moreira, J. O. Borevitz, and M. Long, 2008 Nat-

- 600 ural selection shapes genome-wide patterns of copy-number polymorphism in  
601 *Drosophila melanogaster*. *Science* **320**: 1629–1631.
- 602 Fay, J. C., G. J. Wyckoff, and C. I. Wu, 2001 Positive and negative selection on  
603 the human genome. *Genetics* **158**: 1227–34.
- 604 Geyer, P., M. Green, and V. Corces, 1990 Tissue-specific transcriptional enhancers  
605 may act in trans on the gene located in the homologous chromosome: the molec-  
606 ular basis of transvection in *Drosophila*. *EMBO J* **9**: 2247–56.
- 607 Gramates, L. S., S. J. Marygold, G. D. Santos, J.-M. Urbano, G. Antonazzo, B. B.  
608 Matthews, A. J. Rey, C. J. Tabone, M. A. Crosby, D. B. Emmert, K. Falls, J. L.  
609 Goodman, Y. Hu, L. Ponting, A. J. Schroeder, V. B. Strelets, J. Thurmond,  
610 P. Zhou, and the FlyBase Consortium, 2017 FlyBase at 25: looking to the  
611 future. *Nucleic Acids Res* **45**: D663–D671.
- 612 Haddrill, P. R., D. L. Halligan, D. Tomaras, and B. Charlesworth, 2007 Reduced  
613 efficacy of selection in regions of the *Drosophila* genome that lack crossing over.  
614 *Genome Biol* **8**: R18.
- 615 Huang, W., A. Massouras, Y. Inoue, J. Peiffer, M. Rmia, A. M. Tarone, L. Turla-  
616 pati, T. Zichner, D. Zhu, R. F. Lyman, M. M. Magwire, K. Blankenburg, M. A.  
617 Carbone, K. Chang, L. L. Ellis, S. Fernandez, Y. Han, G. Highnam, C. E.  
618 Hjelman, J. R. Jack, M. Javaid, J. Jayaseelan, D. Kalra, S. Lee, L. Lewis,  
619 M. Munidasa, F. Ongeri, S. Patel, L. Perales, A. Perez, L. Pu, S. M. Rollmann,  
620 R. Ruth, N. Saada, C. Warner, A. Williams, Y.-Q. Wu, A. Yamamoto, Y. Zhang,  
621 Y. Zhu, R. R. Anholt, J. O. Korb, D. Mittelman, D. M. Muzny, R. A. Gibbs,  
622 A. Barbadilla, J. S. Johnston, E. A. Stone, S. Richards, B. Deplancke, and T. F.  
623 Mackay, 2014 Natural variation in genome architecture among 205 *Drosophila*  
624 *melanogaster* Genetic Reference Panel lines. *Genome Res* **24**: 1193–1208.
- 625 Kaminker, J. S., C. M. Bergman, B. Kronmiller, J. Carlson, R. Svirskas, S. Pa-  
626 tel, E. Frise, D. A. Wheeler, S. E. Lewis, G. M. Rubin, M. Ashburner, and  
627 S. E. Celniker, 2002 The transposable elements of the *Drosophila melanogaster*  
628 euchromatin: a genomics perspective. *Genome Biol* **3**: research0084.
- 629 Kim, S. Y., K. E. Lohmueller, A. Albrechtsen, Y. Li, T. Korneliussen, G. Tian,  
630 N. Grarup, T. Jiang, G. Andersen, D. Witte, T. Jorgensen, T. Hansen, O. Ped-  
631 ersen, J. Wang, and R. Nielsen, 2011 Estimation of allele frequency and associ-  
632 ation mapping using next-generation sequencing data. *BMC Bioinformatics* **12**:  
633 231.
- 634 Kofler, R., A. J. Betancourt, and C. Schlotterer, 2012 Sequencing of pooled DNA  
635 samples (pool-seq) uncovers complex dynamics of transposable element inser-  
636 tions in *Drosophila melanogaster*. *PLOS Genet* **8**: e1002487.
- 637 Kofler, R., T. Hill, V. Nolte, A. J. Betancourt, and C. Schlotterer, 2015 The  
638 recent invasion of natural *Drosophila simulans* populations by the P-element.

- 639 Proc Natl Acad Sci USA **112**: 6659–6663.
- 640 Kuhn, R. M., D. Haussler, and W. J. Kent, 2013 The UCSC genome browser and  
641 associated tools. *Brief Bioinform* **14**: 144–161.
- 642 Langley, C. H. and C. F. Aquadro, 1987 Restriction-map variation in natural  
643 populations of *Drosophila melanogaster*: white-locus region. *Mol Biol Evol* **4**:  
644 651–63.
- 645 Langley, C. H., A. E. Shrimpton, T. Yamazaki, N. Miyashita, Y. Matsuo, and  
646 C. F. Aquadro, 1988 Naturally occurring variation in the restriction map of the  
647 Amy region of *Drosophila melanogaster*. *Genetics* **119**: 619–629.
- 648 Lee, Y. C. G., 2015 The role of piRNA-mediated epigenetic silencing in the pop-  
649 ulation dynamics of transposable elements in *Drosophila melanogaster*. *PLOS*  
650 *Genetics* **11**: e1005269.
- 651 Lee, Y. C. G. and G. H. Karpen, 2017 Pervasive epigenetic effects of *Drosophila*  
652 euchromatic transposable elements impact their evolution. *Elife* **6**.
- 653 Lee, Y. C. G. and C. H. Langley, 2010 Transposable elements in natural popula-  
654 tions of *Drosophila melanogaster*. *Philos Trans R Soc Lond, B, Biol Sci* **365**:  
655 1219–1228.
- 656 Lerman, D. N. and M. E. Feder, 2005 Naturally occurring transposable elements  
657 disrupt hsp70 promoter function in *Drosophila melanogaster*. *Mol Biol Evol* **22**:  
658 776–783.
- 659 Linheiro, R. and C. M. Bergman, 2014 Alternate version of File S3 from Linheiro  
660 & Bergman 2012. DOI: 10.6084/m9.figshare.1168882.v1.
- 661 Linheiro, R. S. and C. M. Bergman, 2012 Whole genome resequencing reveals nat-  
662 ural target site preferences of transposable elements in *Drosophila melanogaster*.  
663 *PLOS One* **7**: e30008.
- 664 Lipatov, M., K. Lenkov, D. A. Petrov, and C. M. Bergman, 2005 Paucity of  
665 chimeric gene-transposable element transcripts in the *Drosophila melanogaster*  
666 genome. *BMC Biol* **3**: 24.
- 667 Mackay, T. F. C., S. Richards, E. A. Stone, A. Barbadilla, J. F. Ayroles, D. Zhu,  
668 S. Casillas, Y. Han, M. M. Magwire, J. M. Cridland, M. F. Richardson, R. R. H.  
669 Anholt, M. Barron, C. Bess, K. P. Blankenburg, M. A. Carbone, D. Castellano,  
670 L. Chaboub, L. Duncan, Z. Harris, M. Javaid, J. C. Jayaseelan, S. N. Jhangiani,  
671 K. W. Jordan, F. Lara, F. Lawrence, S. L. Lee, P. Librado, R. S. Linheiro, R. F.  
672 Lyman, A. J. Mackey, M. Munidasa, D. M. Muzny, L. Nazareth, I. Newsham,  
673 L. Perales, L.-L. Pu, C. Qu, M. Ramia, J. G. Reid, S. M. Rollmann, J. Rozas,  
674 N. Saada, L. Turlapati, K. C. Worley, Y.-Q. Wu, A. Yamamoto, Y. Zhu, C. M.  
675 Bergman, K. R. Thornton, D. Mittelman, and R. A. Gibbs, 2012 The *Drosophila*  
676 *melanogaster* Genetic Reference Panel. *Nature* **482**: 173–178.
- 677 Makunin, I. V., V. V. Shloma, S. J. Stephen, M. Pheasant, and S. N. Belyakin,

- 678 2013 Comparison of ultra-conserved elements in Drosophilids and vertebrates.  
679 PLOS ONE **8**: e82362.
- 680 Negre, N., C. D. Brown, L. Ma, C. A. Bristow, S. W. Miller, U. Wagner, P. Kherad-  
681 pour, M. L. Eaton, P. Loriaux, R. Sealfon, Z. Li, H. Ishii, R. F. Spokony, J. Chen,  
682 L. Hwang, C. Cheng, R. P. Auburn, M. B. Davis, M. Domanus, P. K. Shah, C. A.  
683 Morrison, J. Zieba, S. Suchy, L. Senderowicz, A. Victorsen, N. A. Bild, A. J.  
684 Grundstad, D. Hanley, D. M. MacAlpine, M. Mannervik, K. Venken, H. Bellen,  
685 R. White, M. Gerstein, S. Russell, R. L. Grossman, B. Ren, J. W. Posakony,  
686 M. Kellis, and K. P. White, 2011 A cis-regulatory map of the Drosophila genome.  
687 Nature **471**: 527–31.
- 688 Nelson, M. G., R. S. Linheiro, and C. M. Bergman, 2017 McClintock: an integrated  
689 pipeline for detecting transposable element insertions in whole-genome shotgun  
690 sequencing data. G3 **7**: 2749–2762.
- 691 Nielsen, R., T. Korneliussen, A. Albrechtsen, Y. Li, and J. Wang, 2012 SNP  
692 calling, genotype calling, and sample allele frequency estimation from new-  
693 generation sequencing data. PLOS ONE **7**: e37558.
- 694 Nuzhdin, S. V., 1999 Sure facts, speculations, and open questions about the evo-  
695 lution of transposable element copy number. Genetica **107**: 129.
- 696 Petrov, D. A., A.-S. Fiston-Lavier, M. Lipatov, K. Lenkov, and J. Gonzalez, 2011  
697 Population genomics of transposable elements in Drosophila melanogaster. Mol  
698 Biol Evol **28**: 1633–1644.
- 699 Presgraves, D. C., 2005 Recombination enhances protein adaptation in Drosophila  
700 melanogaster. Curr Biol **15**: 1651–1656.
- 701 Quinlan, A. R. and I. M. Hall, 2010 BEDTools: a flexible suite of utilities for  
702 comparing genomic features. Bioinformatics **26**: 841–842.
- 703 R Core Team, 2016 *R: a language and environment for statistical computing*.  
704 Vienna, Austria, ISBN 3-900051-07-0.
- 705 Rishishwar, L., L. Mario-Ramrez, and I. K. Jordan, 2017 Benchmarking compu-  
706 tational tools for polymorphic transposable element detection. Brief Bioinform  
707 **18**: 908–918.
- 708 Sackton, T. B., R. J. Kulathinal, C. M. Bergman, A. R. Quinlan, E. B. Dopman,  
709 M. Carneiro, G. T. Marth, D. L. Hartl, and A. G. Clark, 2009 Population  
710 genomic inferences from sparse high-throughput sequencing of two populations  
711 of Drosophila melanogaster. Genome Biol Evol **1**: 449–65.
- 712 Schaeffer, S. W., C. F. Aquadro, and C. H. Langley, 1988 Restriction-map varia-  
713 tion in the Notch region of Drosophila melanogaster. Mol Biol Evol **5**: 30–40.
- 714 Siepel, A., G. Bejerano, J. S. Pedersen, A. S. Hinrichs, M. Hou, K. Rosenbloom,  
715 H. Clawson, J. Spieth, L. W. Hillier, S. Richards, G. M. Weinstock, R. K. Wil-  
716 son, R. A. Gibbs, W. J. Kent, W. Miller, and D. Haussler, 2005 Evolutionarily

- 717 conserved elements in vertebrate, insect, worm, and yeast genomes. *Genome*  
718 *Res* **15**: 1034–1050.
- 719 Singh, N. D., P. F. Arndt, and D. A. Petrov, 2005 Genomic heterogeneity of  
720 background substitutional patterns in *Drosophila melanogaster*. *Genetics* **169**:  
721 709–22.
- 722 Smit, A., R. Hubley, and P. Green, 2013 RepeatMasker.
- 723 Spradling, A. C., D. M. Stern, I. Kiss, J. Roote, T. Laverty, and G. M. Rubin,  
724 1995 Gene disruptions using P transposable elements: an integral component of  
725 the *Drosophila* genome project. *Proc Natl Acad Sci USA* **92**: 10824–10830.
- 726 Steele, L. D., B. Coates, M. C. Valero, W. Sun, K. M. Seong, W. M. Muir, J. M.  
727 Clark, and B. R. Pittendrigh, 2015 Selective sweep analysis in the genomes of  
728 the 91-R and 91-C *Drosophila melanogaster* strains reveals few of the usual  
729 suspects in dichlorodiphenyltrichloroethane (DDT) resistance. *PLOS ONE* **10**:  
730 e0123066.
- 731 Tyner, C., G. P. Barber, J. Casper, H. Clawson, M. Diekhans, C. Eisenhart, C. M.  
732 Fischer, D. Gibson, J. N. Gonzalez, L. Guruvadoo, M. Haeussler, S. Heitner,  
733 A. S. Hinrichs, D. Karolchik, B. T. Lee, C. M. Lee, P. Nejad, B. J. Raney, K. R.  
734 Rosenbloom, M. L. Speir, C. Villarreal, J. Vivian, A. S. Zweig, D. Haussler,  
735 R. M. Kuhn, and W. J. Kent, 2017 The UCSC Genome Browser database: 2017  
736 update. *Nucleic Acids Res* **45**: D626–D634.
- 737 Wan, H., Y. Liu, M. Li, S. Zhu, X. Li, B. R. Pittendrigh, and X. Qiu, 2014  
738 Nrf2/Maf-binding-site-containing functional Cyp6a2 allele is associated with  
739 DDT resistance in *Drosophila melanogaster*. *Pest Manag Sci* **70**: 1048–1058.
- 740 Wang, J., P. D. Keightley, and D. L. Halligan, 2007 Effect of divergence time and  
741 recombination rate on molecular evolution of *Drosophila* INE-1 transposable  
742 elements and other candidates for neutrally evolving sites. *J Mol Evol* **65**: 627.
- 743 Waters, L. C., A. C. Zelhof, B. J. Shaw, and L. Y. Ch'ang, 1992 Possible involve-  
744 ment of the long terminal repeat of transposable element 17.6 in regulating  
745 expression of an insecticide resistance-associated P450 gene in *Drosophila*. *Proc*  
746 *Natl Acad Sci USA* **89**: 4855–4859.
- 747 Zhang, Y., M. T. Romanish, and D. L. Mager, 2011 Distributions of transposable  
748 elements reveal hazardous zones in mammalian introns. *PLOS computational*  
749 *biology* **7**: e1002046+.
- 750 Zhuang, J., J. Wang, W. Theurkauf, and Z. Weng, 2014 TEMP: a computational  
751 method for analyzing transposable element polymorphism in populations. *Nu-*  
752 *cleic Acids Res* **42**: 6826–6838.

Table 1: **TE insertions in normal recombination regions.** Columns contain the coverage (in base pairs) and percent of the normally-recombining genome covered for exonic, intronic and intergenic regions followed by the number and percent of TE insertions found fully in exonic, intronic and intergenic regions or spanning intron/exon and intergenic/exon boundaries for both `ngs_te_mapper` and `TEMP`. Overlap categories have “n.a.” for coverage and percent of the normally-recombining genome covered since boundaries between compartments do not occupy any space. Regions of the reference genome identified by RepeatMasker as TE were excluded from all other compartments and any non-reference TE in these regions are included in the “Reference TE” compartment. Regions of normal recombination were defined by Cridland *et al.* (2013).

| Region          | Coverage (bp) | % normal rec. genome | # <code>ngs_te_mapper</code> TE | % <code>ngs_te_mapper</code> TE | # <code>TEMP</code> TE | % <code>TEMP</code> TE |
|-----------------|---------------|----------------------|---------------------------------|---------------------------------|------------------------|------------------------|
| Exon            | 27502613      | 25.4                 | 399                             | 6.5                             | 278                    | 5.9                    |
| Intron          | 38960671      | 36                   | 2743                            | 45                              | 2153                   | 45.9                   |
| Intron/Exon     | n.a.          | n.a.                 | 5                               | 0.1                             | 7                      | 0.1                    |
| Intergenic      | 37804929      | 35                   | 2905                            | 47.6                            | 2210                   | 47.1                   |
| Intergenic/Exon | n.a.          | n.a.                 | 9                               | 0.1                             | 4                      | 0.1                    |
| Reference TE    | 3831787       | 3.5                  | 38                              | 0.6                             | 36                     | 0.8                    |
| Total           | 108100000     | 100                  | 6099                            | 100                             | 4688                   | 100                    |



Table 2: **TE insertions in noncoding regions with normal recombination** Columns contain the coverage (in base pairs) and percent of the normally-recombining noncoding genome covered by CNEs and spacers for introns and intergenic regions followed by the number and percent of TE insertions found fully in CNEs and spacers or spanning CNE/spacer boundaries for both `ngs_te_mapper` and `TEMP`. Overlap categories have “n.a.” for coverage and percent of the normally-recombining noncoding genome covered since boundaries between compartments do not occupy any space. Regions of the reference genome identified by RepeatMasker as TE and any non-reference TE in these regions were excluded from all compartments. Regions of normal recombination were defined by Cridland *et al.* (2013).

| Region                | Coverage (bp) | % normal rec.<br>noncoding genome | # <code>ngs_te_mapper</code> TE | % <code>ngs_te_mapper</code> TE | # <code>TEMP</code> TE | % <code>TEMP</code> TE |
|-----------------------|---------------|-----------------------------------|---------------------------------|---------------------------------|------------------------|------------------------|
| Intronic CNE          | 14093340      | 18.4                              | 747                             | 13.2                            | 500                    | 11.5                   |
| Intronic spacer       | 24867331      | 32.4                              | 1842                            | 32.6                            | 1458                   | 33.4                   |
| Intronic CNE/Spacer   | n.a.          | n.a.                              | 154                             | 2.7                             | 195                    | 4.5                    |
| Intergenic CNE        | 14749396      | 19.2                              | 813                             | 14.4                            | 577                    | 13.2                   |
| Intergenic spacer     | 23055533      | 30                                | 1928                            | 34.1                            | 1447                   | 33.2                   |
| Intergenic CNE/Spacer | n.a.          | n.a.                              | 164                             | 2.9                             | 186                    | 4.3                    |
| Total                 | 76765600      | 100                               | 5648                            | 100                             | 4363                   | 100                    |

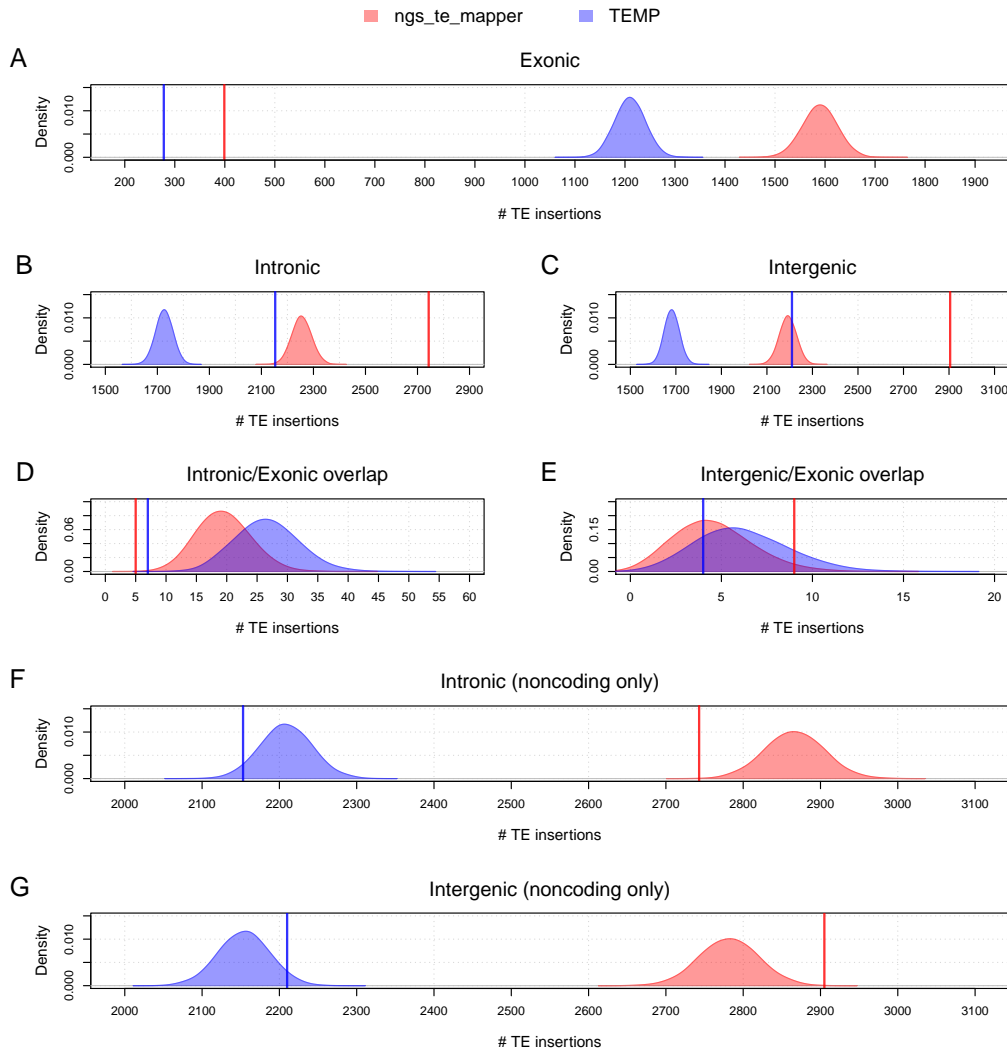

**Figure 1: TEs in normally-recombining regions of the *D. melanogaster* genome are depleted in exonic and intronic regions.** Observed numbers of TEs in different genomic compartments are shown as vertical lines for `ngs_te_mapper` (red) and `TEMP` (blue). Empirical null distributions of the numbers of TEs in different genomic compartments in 10,000 random permutations are shown as density plots for `ngs_te_mapper` (red) and `TEMP` (blue). All permutation analyses were restricted to normally-recombining regions of the *D. melanogaster* genome as defined by Cridland *et al.* (2013). Permutation analyses were conducted across all compartments (A-E), or in noncoding regions only (F,G). Observed and simulated numbers of TEs were counted in exonic regions (A), intronic regions (B,F), intergenic regions (C,G), intronic/exonic boundaries (D), and intergenic/exonic boundaries (E). Observed TEs overlapping intron/exon boundaries or intergenic/exon boundaries were excluded from permutation analyses in noncoding regions only (F,G). Regions of the reference genome identified by RepeatMasker as TE sequence and any non-reference TE in these regions were also excluded from all permutation analyses.

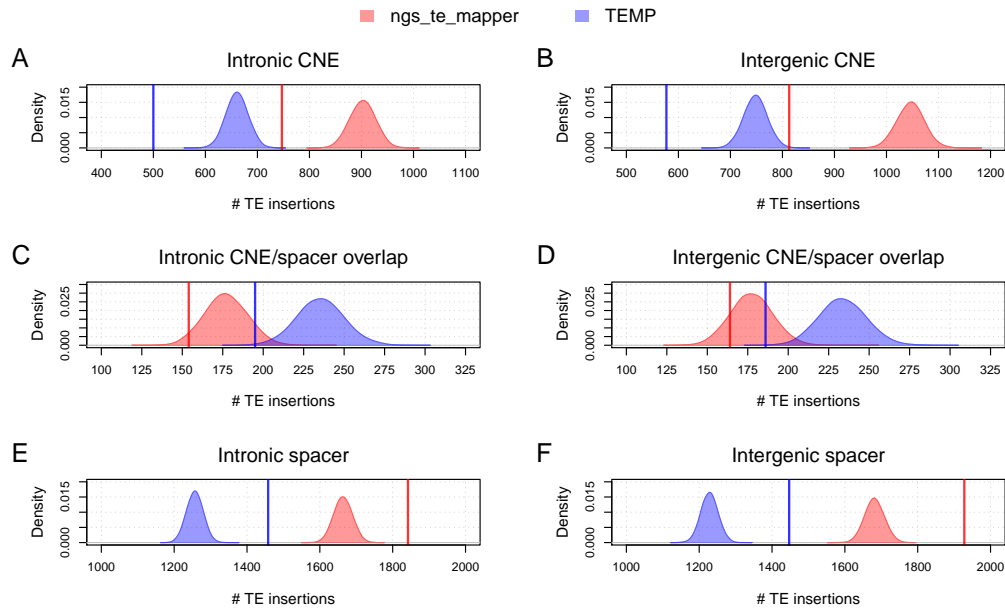

Figure 2: **TEs in normally-recombining regions of the *D. melanogaster* genome are depleted in conserved noncoding elements.** Observed numbers of TEs in different noncoding compartments are shown as vertical lines for `ngs_te_mapper` (red) and `TEMP` (blue). Empirical null distributions of the numbers of TEs in different noncoding compartments in 10,000 random permutations are shown as density plots for `ngs_te_mapper` (red) and `TEMP` (blue). All permutation analyses were restricted to normally-recombining regions of the *D. melanogaster* genome as defined by Cridland *et al.* (2013). Permutation analyses were conducted across intronic regions only (A,C,E) or intergenic regions only (B,D,F). Observed and simulated numbers of TEs were counted in CNEs (A,B), CNE/spacer boundaries (C,D), or spacers (E,F). The `TEMP` dataset has higher number of observed and expected CNE/spacer overlaps (C,D) despite having fewer TE insertions overall because of a larger average TSD length (7.71 bp) relative to `ngs_te_mapper` (4.73 bp). Observed TEs overlapping intron/exon boundaries or intergenic/exon boundaries were excluded from these analyses. Regions of the reference genome identified by RepeatMasker as TE sequence and any non-reference TE in these regions were also excluded from all permutation analyses.

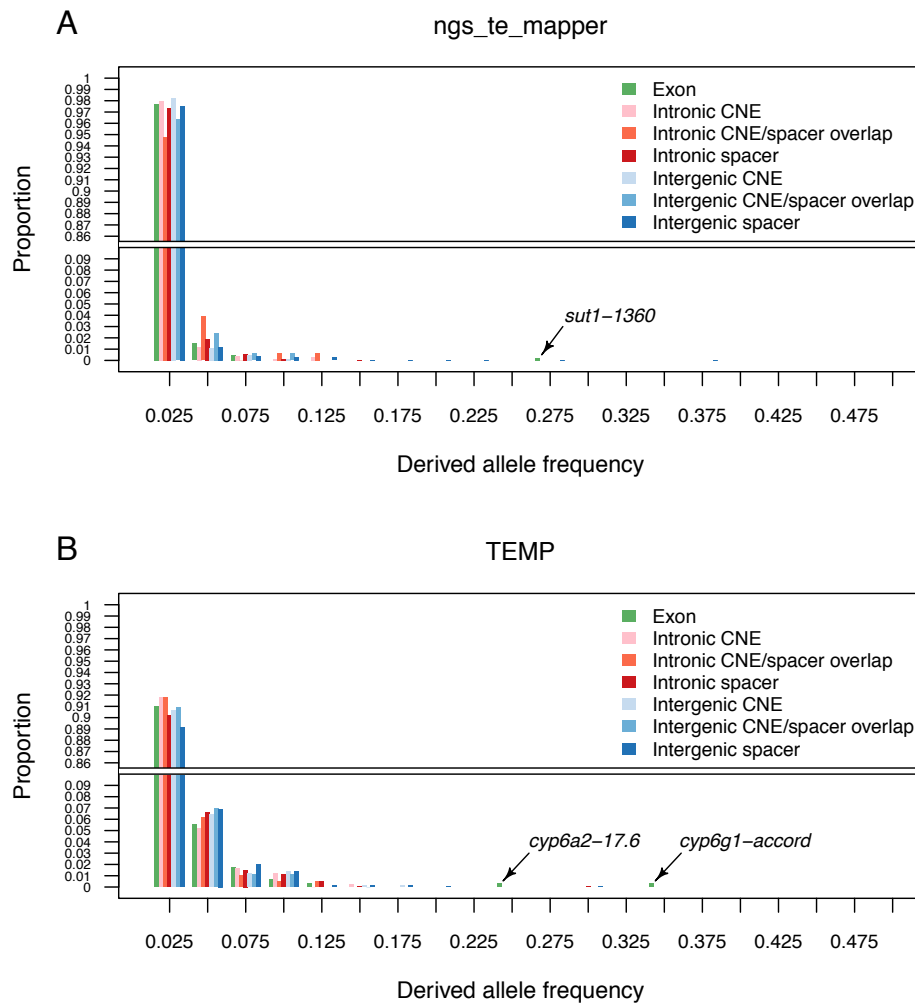

Figure 3: **The derived allele frequency (DAF) spectrum for TE insertions is similar across different compartments of the *D. melanogaster* genome.** DAF spectra are shown for TE insertions predicted by *ngs\_te\_mapper* (A) or *TEMP* (B). Allele frequency classes are shown on the X-axis, and the proportion of TE insertions observed in a particular compartment of the genome at that allele frequency is shown on the Y-axis. Note that the Y-axis is split to allow better visualization of the proportion of higher allele frequency classes.
